# Supplementary material for: Intracardiac Echocardiogram: Feasibility, Efficacy, and Safety for Guidance of Transcatheter Multiple Atrial Septal Defects Closure
Source: MDPI journal article supplement (doi:10.3390/jcm11092394), 2022-04-24
Supplement: s1 [file s1]

Supplementary Table S1. Basic characteristics and Outcomes of procedure using ICE for patients under 10kg of body weight

| Variables                       | Total(%)<br>N=185 (100) | B.Wt<10Kg(%)<br>n=24(13) |
|---------------------------------|-------------------------|--------------------------|
| <b>Age, year</b>                |                         |                          |
| Mean ± SD                       | 22.1 ± 23.4             | 1.3± 0.5                 |
| (range)                         | (9 mo–77 y)             | (9mo-1y 9mo)             |
| <b>Bodyweight, kg</b>           |                         |                          |
| Mean ± SD                       | 36.6 ± 25.1             | 8.7±1.2                  |
| (range)                         | (5–94.9)                | (5-9.9)                  |
| <b>ASD defect count (%)</b>     |                         |                          |
| 2                               | 118 (63.8)              | 15(62.5)                 |
| 3                               | 39 (21.1)               | 4(16.7)                  |
| ≥4                              | 28 (15.1)               | 5(20.8)                  |
| <b>Distance between defects</b> |                         |                          |
| <7 mm                           | 120(64.9)               | 19(79.2)                 |
| ≥7 mm                           | 62(33.5)                | 4(16.7)                  |
| Difficult to measure            | 3(1.6)                  | 1(4.2)                   |
| <b>Number of devices</b>        |                         |                          |
| 1                               | 146(79.3)               | 24(100)                  |
| 2                               | 33(17.9)                |                          |
| 3                               | 5(2.7)                  |                          |
| <b>Procedural success rate</b>  | 182(98.4)               | 24(100)                  |
| <b>Immediate outcomes</b>       |                         |                          |
| Complete closure                | 8(4.4)                  | 0                        |
| Residual primary defects        | 169(92.9)               | 11(45.8)                 |
| Other isolated defects          | 86(47.2)                | 13(54.2)                 |
| Complication                    | 3(1.6)                  | 0                        |
| (device embolization,           |                         |                          |

|                                     |           |          |
|-------------------------------------|-----------|----------|
| <b>Complete AV block)</b>           |           |          |
| <b>Long term outcomes</b>           |           |          |
| <b>Complete closure</b>             | 116(63.7) | 18(75.0) |
| <b>Residual primary defects</b>     | 35(13.2)  | 2(8.3)   |
| <b>Other isolated defects</b>       | 42(23.1)  | 4(16.7)  |
| <b>Complication &amp; mortality</b> | 0         | 0        |

B.Wt, body weight; SD, standard deviation; ASD, atrial septal defect
